# Supplementary material
Source: PubMed Central journal article supplement (PMC5070884)
Supplement: ejhg2015228x1.pdf [file ejhg2015228x1.pdf]

## **Supplemental Data**

### **Identification of candidate genes for familial early-onset essential tremor**

Xinmin Liu, Nora Hernandez, Sergey Kisselev, Aris Floratos, Ashley Sawle, Iuliana Ionita-Laza, Ruth Ottman, Elan D. Louis, and Lorraine N. Clark

## **Supplemental Material and Methods**

### **Linkage Analysis**

#### *SNP Genotyping For Linkage Analysis in 37 ET Families:*

Single nucleotide polymorphism (SNP) genotyping was performed using the Illumina Omni Express Array on the Illumina iScan platform in all available family members in 37 ET families. The Illumina Omni Express array contains >715,000 SNPs with 392,197 SNPs located within, 10Kb of Refseq genes, and 15,062 nonsynonymous SNPs. The mean and median spacing of SNPs across the genome is, 4.0Kb and 2.1Kb, respectively. Extensive quality control (QC) steps of SNP data was performed prior to linkage analysis, and included sample call rate (>97%), SNP assay performance including call rate (>98%), GenTrain score (0.25) and Gencall score (>0.15), and concordance for duplicate samples (n=20; 100%). A total of 6 samples had call rates <97% and were removed. A total of, 41,490 SNPs, had call rates <98% and were removed from further analysis. The final number of SNPs used in the analysis was 678,176.

#### *Nonparametric linkage analysis:*

MERLIN (version 1.1.2) was used to evaluate individual SNPs for Mendelian inconsistencies based on the pedigree structure, and families showing Mendelian

inconsistencies at a particular SNP were excluded from analysis. SNP marker alleles frequencies were tested for departures from Hardy-Weinberg equilibrium (HWE) using MERLIN. SNPs that showed departure from HWE and were excluded from further analysis. Nonparametric linkage analysis was performed using MERLIN version 1.1.2. In order to minimize the risk of false positives due to LD among SNPs, we pruned the original list of SNPs such that the remaining set of SNPs contained only SNPs with ( $r^2 < 0.05$ ). The final number of SNPs used for linkage analysis was 64,262. We calculated two nonparametric linkage statistics, namely the Whittemore and Halpern non-parametric linkage (NPL) pairs (--pairs) and NPL all (--npl) statistics. We performed two sets of analyses: 1) a stringent analysis (phenotype 1, P1) in which only individuals with a diagnosis of definite or probable ET were classified as affected, and individuals with a diagnosis of possible ET were classified as unknown, and 2) a secondary analysis with a broader phenotype (phenotype 2, P2) in which individuals with a diagnosis of definite, probable or possible ET were classified as affected.

## **Exome Sequencing**

### *Gene and Variant Level Annotation:*

The web URLs for all software tools and programs used for gene and variant level annotation are provided in Web Resources. Gene level annotation was performed using the residual variant intolerance score (RVIS). Variant level annotation was performed using the variant annotation tool (VAT), SnpEff and Annovar. Non-synonymous single nucleotide variants were also annotated with *in silico* prediction programs including PROVEAN, Mutation Taster, Polyphen and SIFT. Annotation was also performed using the 'combined annotation dependent depletion score' (CADD). Evolutionary conservation

of variants was assessed with Genomic Evolutionary Rate Profiling (GERP) scores. We examined the function of genes that carry 'candidate' variants predicted to be damaging or deleterious with documented neurodevelopmental, neurobehavioral or neurodegenerative phenotype in humans or in animal models (mouse, C.elegans, Drosophila, Zebrafish). For human annotation, we used published literature in Pubmed together with Genecards, the database for annotation, visualization and integrated discovery (DAVID) v6.7, the human phenotype ontology database, Phenotips, OMIM, HGMD, Orphanet and DECIPHER. For animal models we used published literature, Genecards, mammalian phenotype ontology flybase, wormatlas, and the zebrafish model organism database.

#### *pVAAST Analyses:*

We used pVAAST (<http://www.yandell-lab.org/software/vaast.html>), a disease-gene identification tool designed for high throughput sequence data in pedigrees, to analyze WES data from affected ET cases with a definite, probable or possible diagnosis of ET in 37 early-onset ET families. pVAAST is a tool that combines linkage analysis, case-control association and functional variant prediction in a unified statistical framework that offers much higher power relative to each of the individual methods. pVAAST analysis was performed assuming an autosomal dominant mode of inheritance and using the maximum number of permutations of 1,000,000 in the test. Genes were retained with  $p\text{-value} < 0.05$  and there were a total of 146 genes with  $p\text{-value} < 0.05$ . Gene candidates are ranked by  $p\text{-value}$  (based on combined linkage and association evidence, smallest to largest). The  $p\text{-value}$  and significance value was obtained from permutation and gene-drop simulations. When two genes have the same  $p\text{-value}$ , the pVAAST score of each gene determines the rank. The pVAAST score (CLRT score from VAAST plus  $2\ln(10)\times\text{LOD}$ ) combines variant frequency data with amino acid score and phylo-genetic conservation information using a composite likelihood ratio test (CLRT) and in addition integrates linkage information (quantified by a LOD score) as a separate likelihood ratio in the pVAAST CLRT (CLRTp).

The background 'control' genome set used for association analysis consisted of 1,057 exomes from the 1000 genomes project phase I data.

*Variant Genotyping and Segregation Analysis:*

Genotyping of candidate variants in additional family members for segregation analysis was performed using matrix-assisted laser desorption/ionization time-of-flight mass spectrometry (Sequenom, San Diego, CA, USA) with Sequenom iPLEX Gold custom assays designed using MassARRAY assay design software version 4.0 (Sequenom).

Amplification was carried out on Applied Biosystems GeneAmp 9700 thermocyclers (Life Technologies, Carlsbad, CA, USA) using standard recommended cycling conditions for iPLEX Gold assays. The mass of extension products was measured and recorded using a mass array compact mass spectrometer (Bruker Daltonik, Billerica, MA, USA).

Genotypes were clustered and called using SpectroTYPER software version 2.0 (Sequenom). DNA samples were analyzed in duplicate, and genotype calls were assigned without prior knowledge of the diagnostic status of the samples analyzed.

Genotypes that were discordant in replicates (N = 2) were manually called as no calls.

**Figure S1 Pedigree Structures of the 37 ET Families included in the linkage and exome analysis**

Genetic pedigrees for families with likely pathogenic mutations are shown. The generation in each pedigree is indicated by roman numerals. The proband is indicated by an arrowhead. A '+' symbol indicates subjects that were exome sequenced. Below each subject with DNA available for genetic analysis the subject id (00X), age at tremor onset and date of birth is indicated. Symbol shading is as follows: Definite ET, symbols completely black; Probable ET: symbols half vertical black fill; Possible ET, symbols with a quadrant in black; Unaffected, clear symbol.

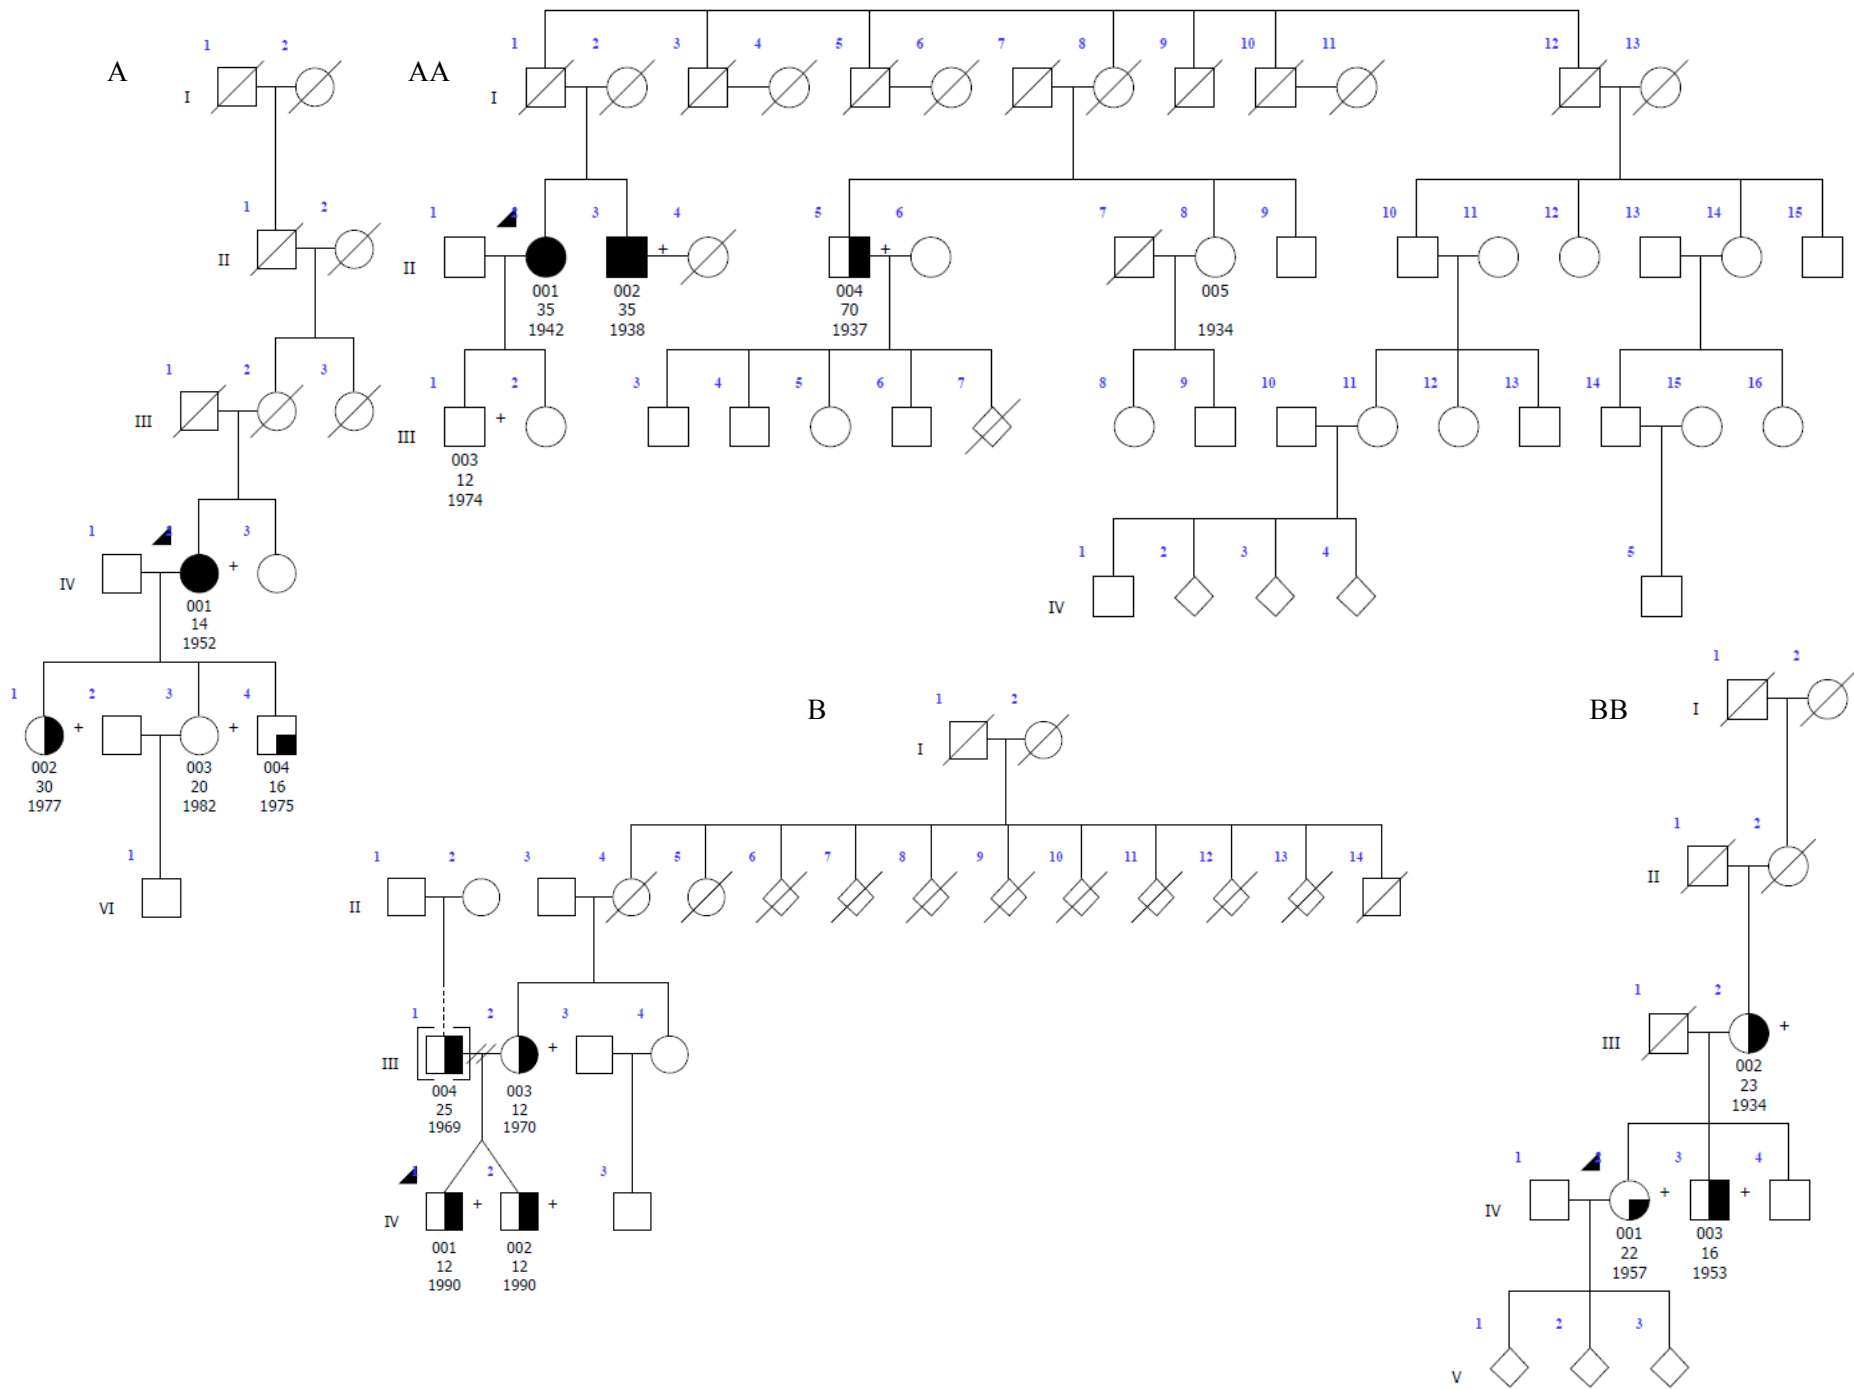



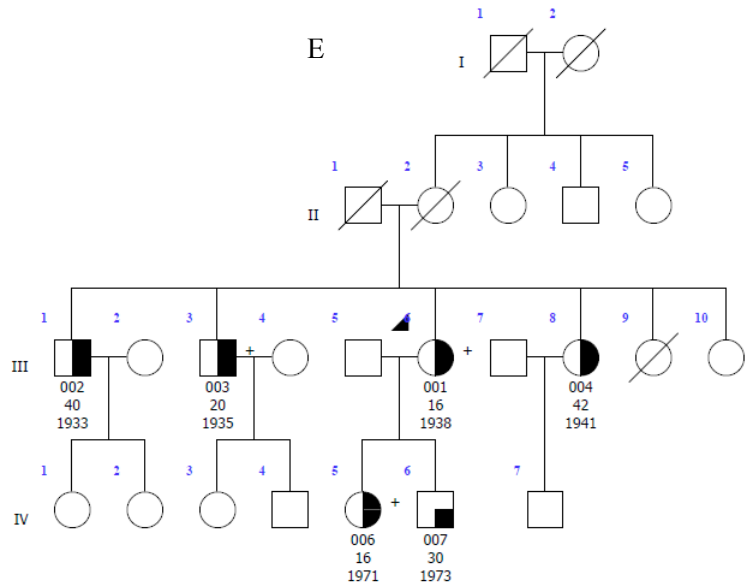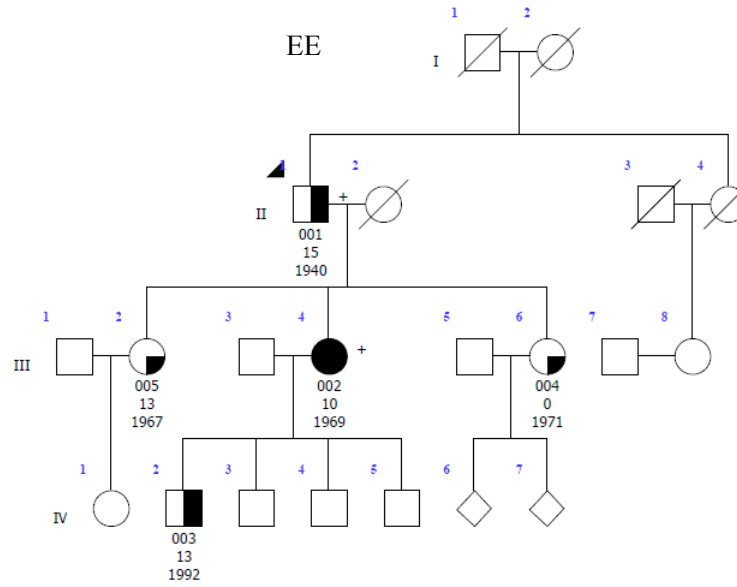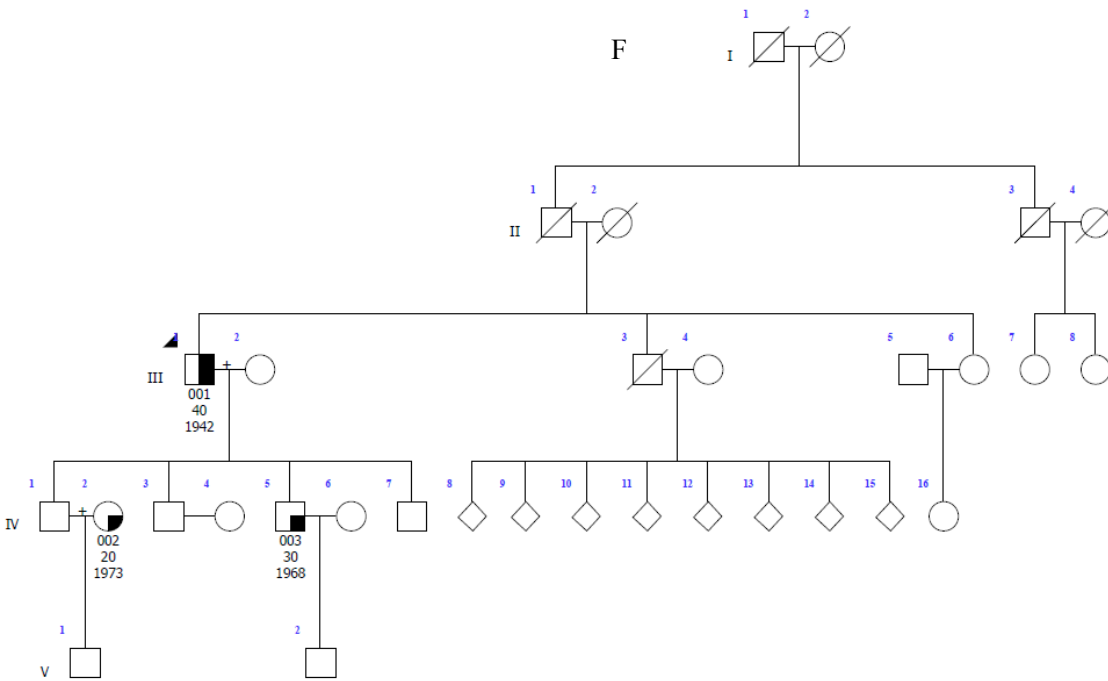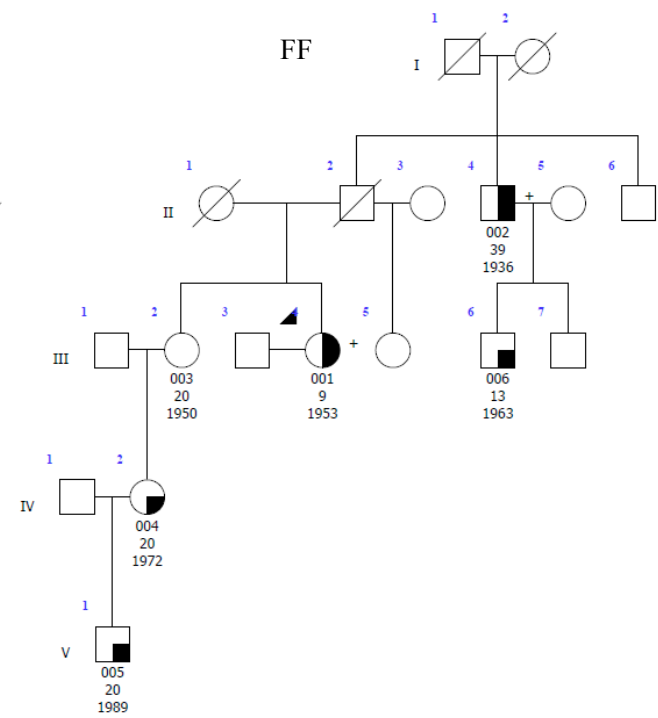



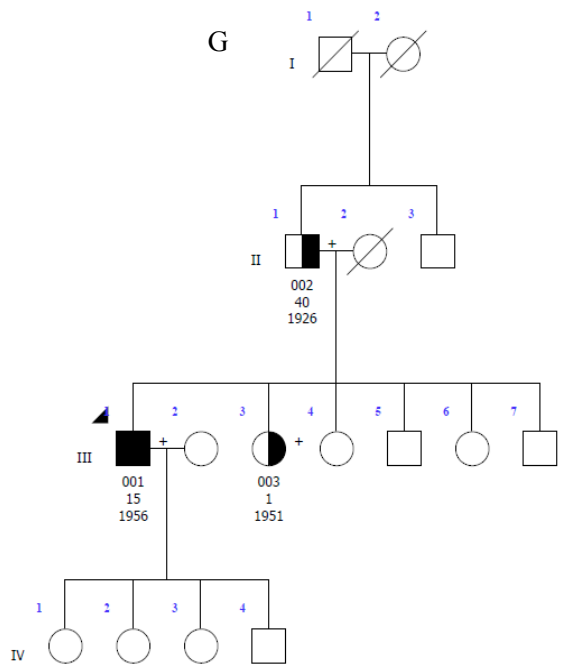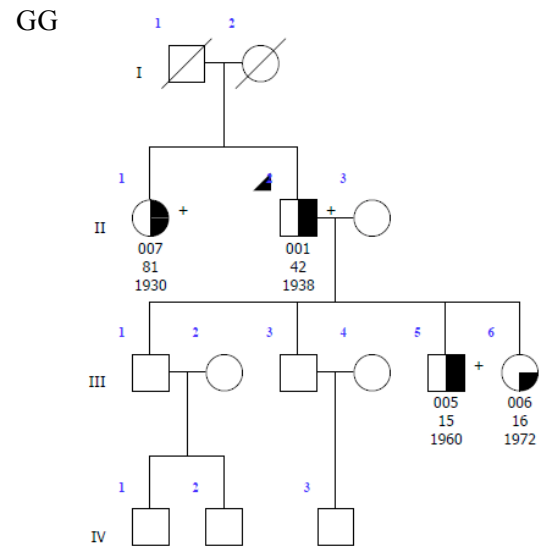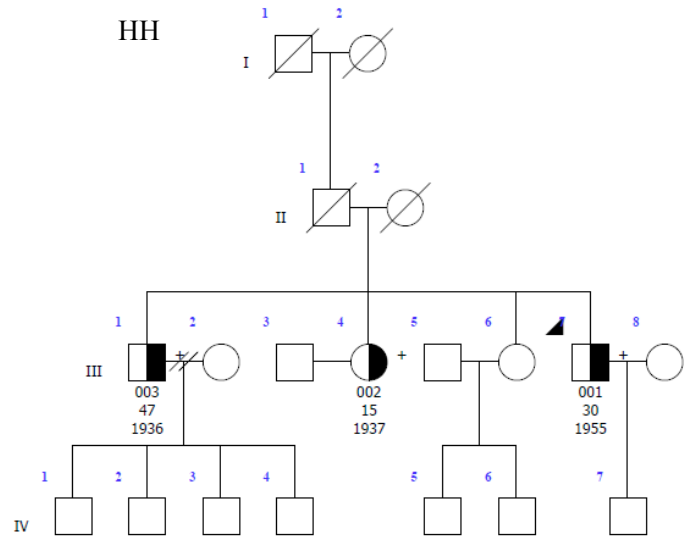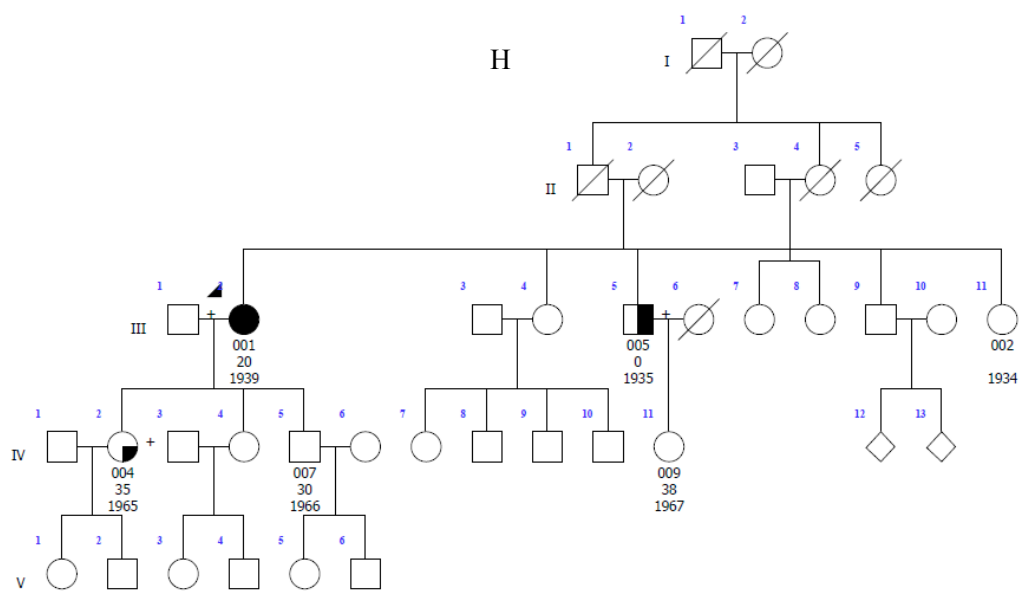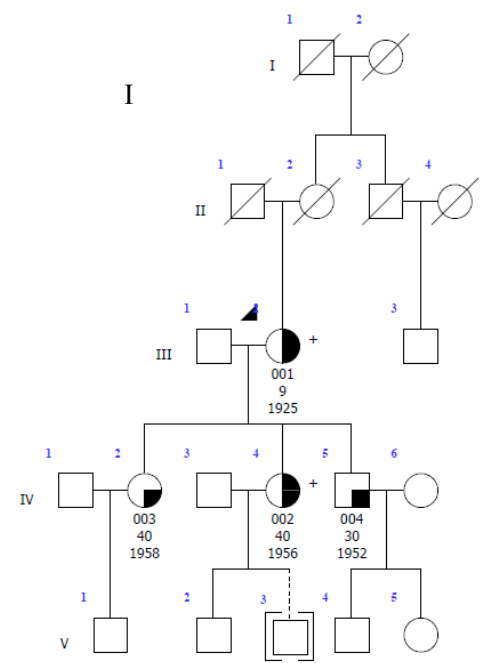

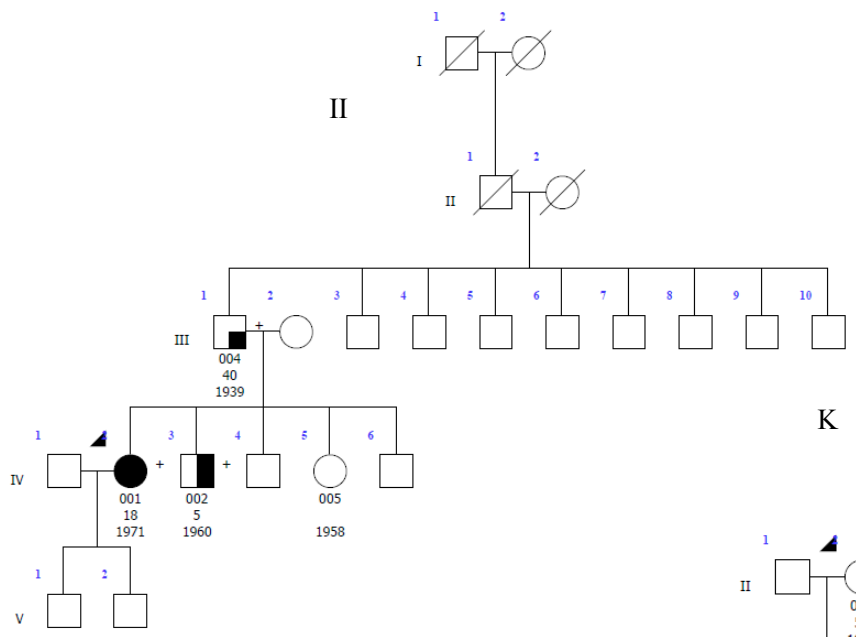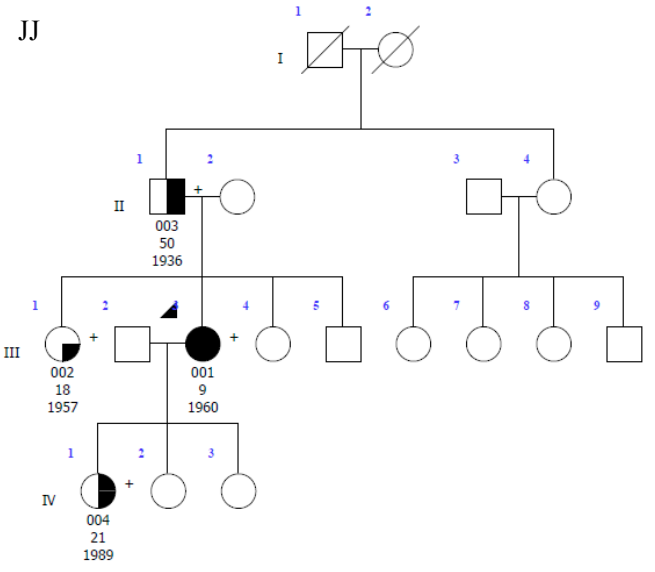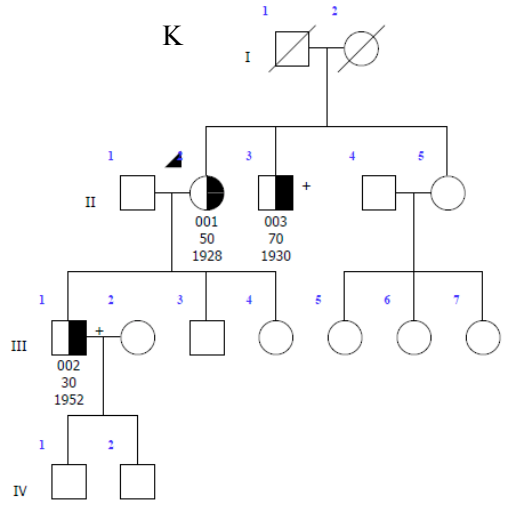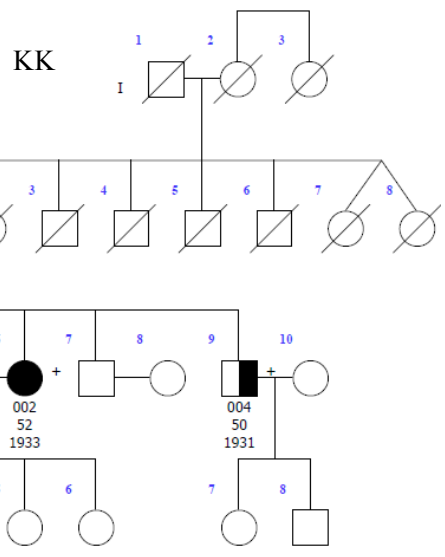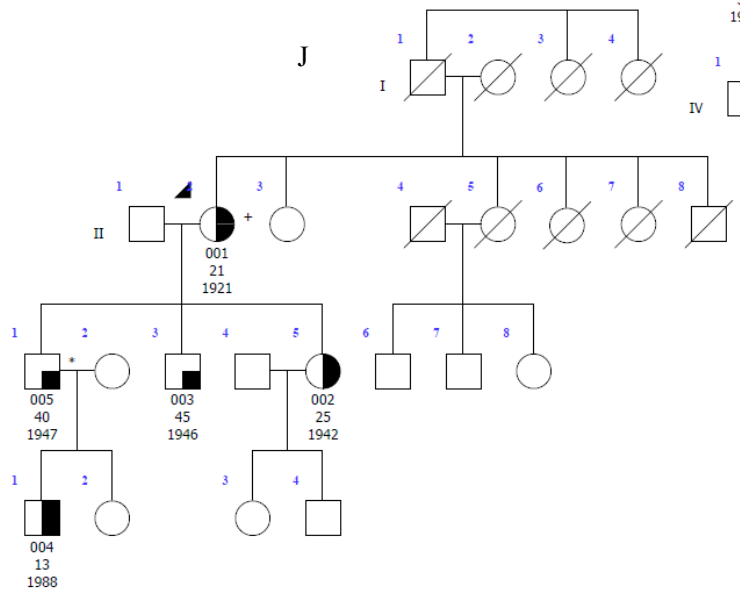

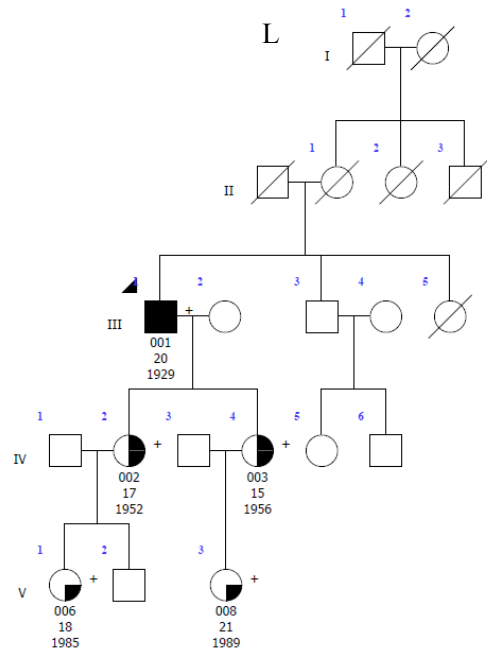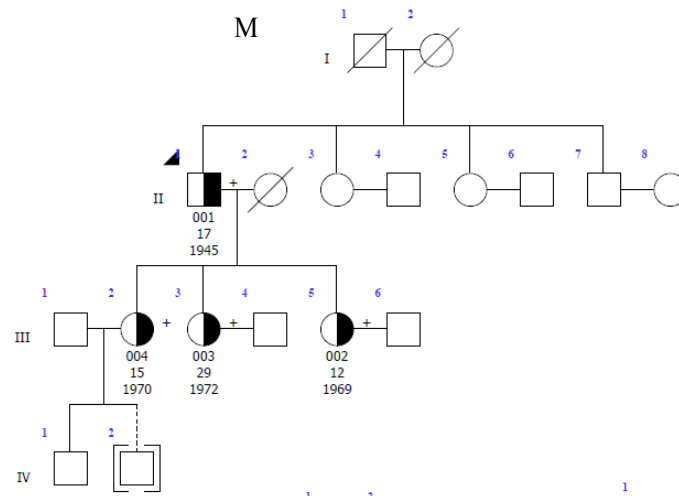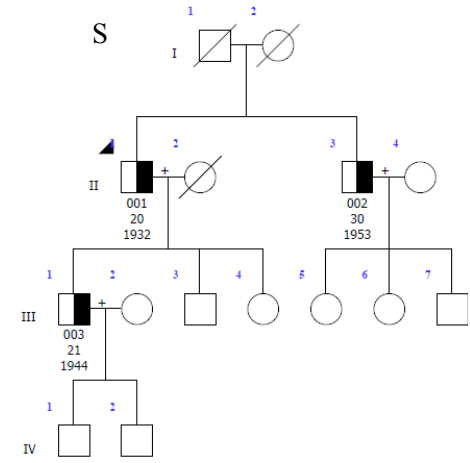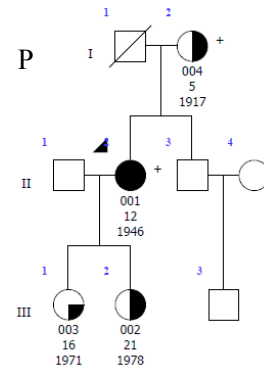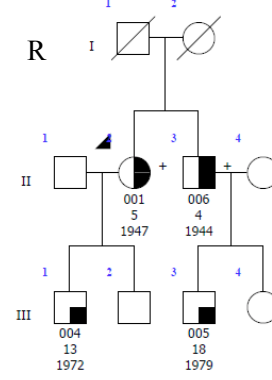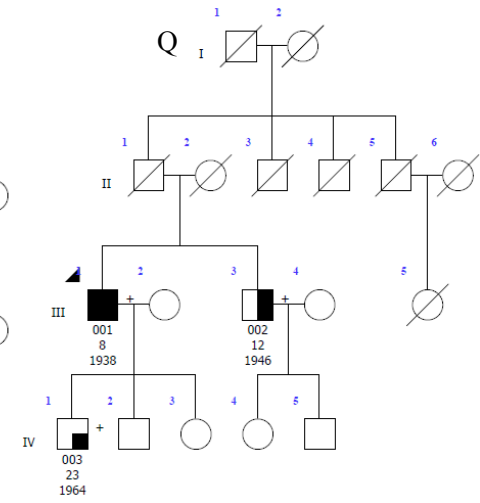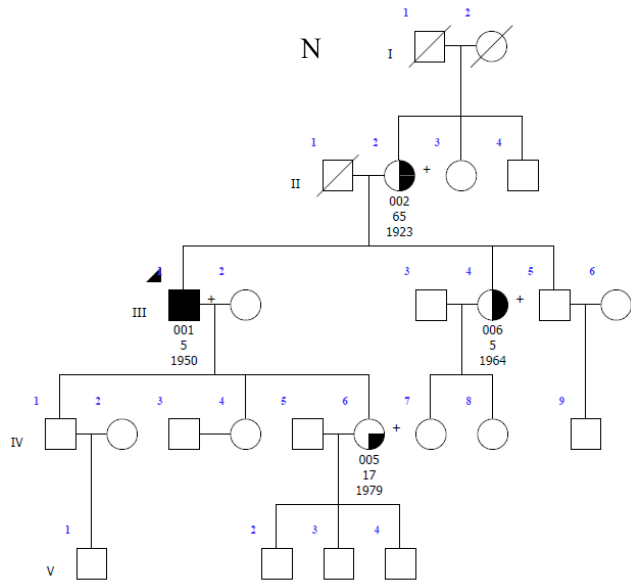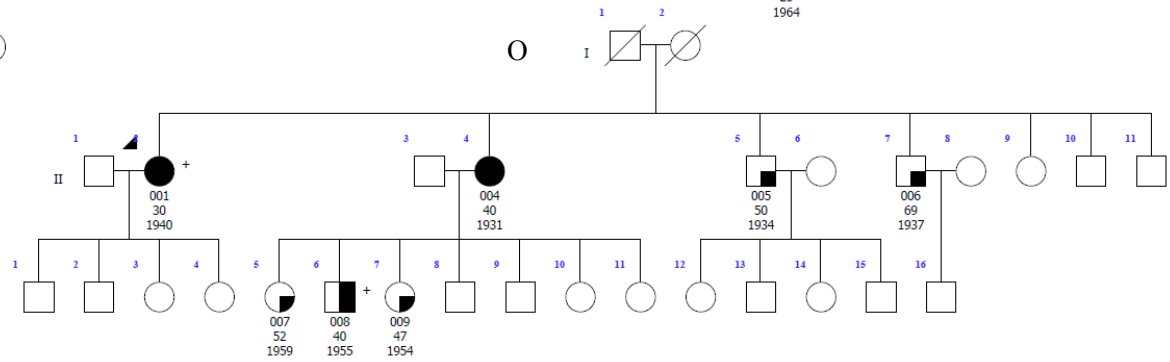

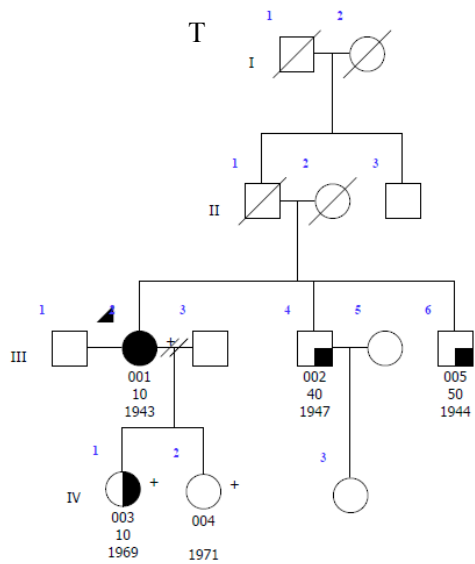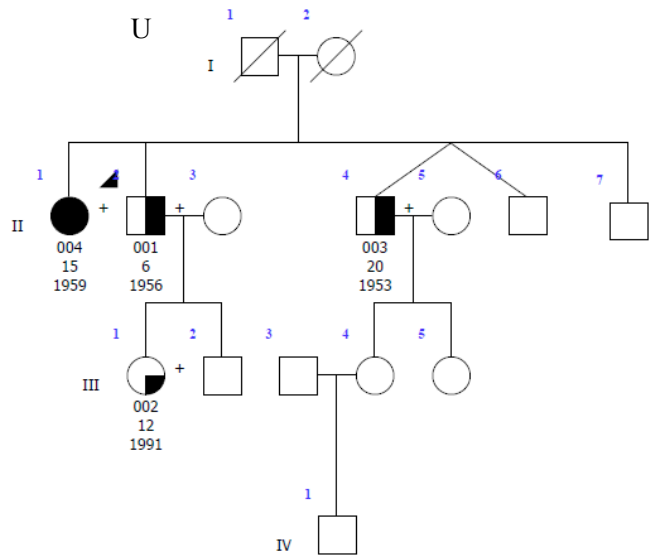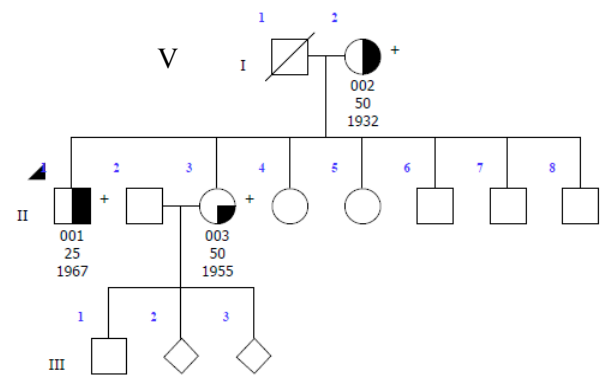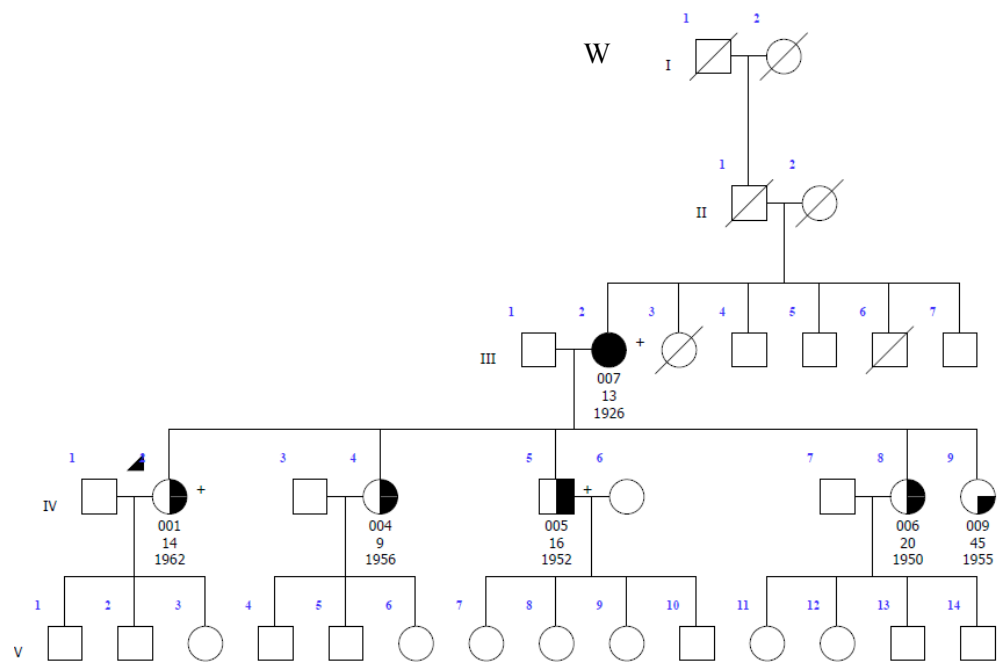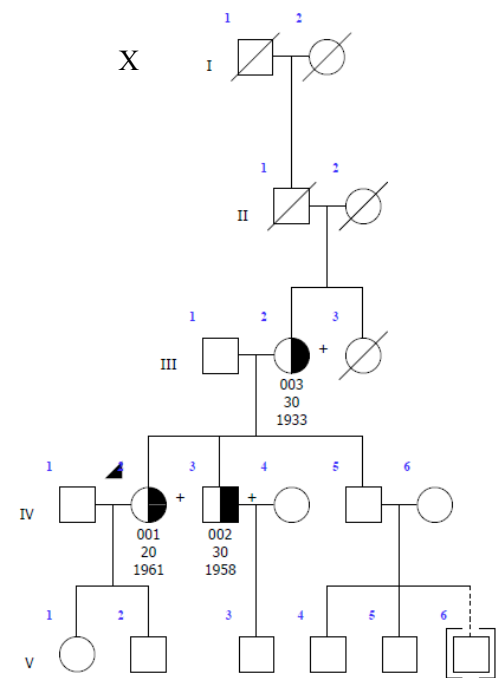

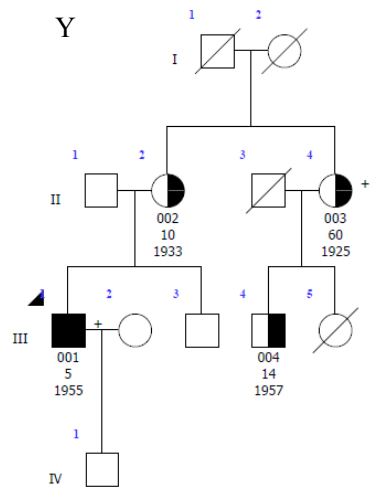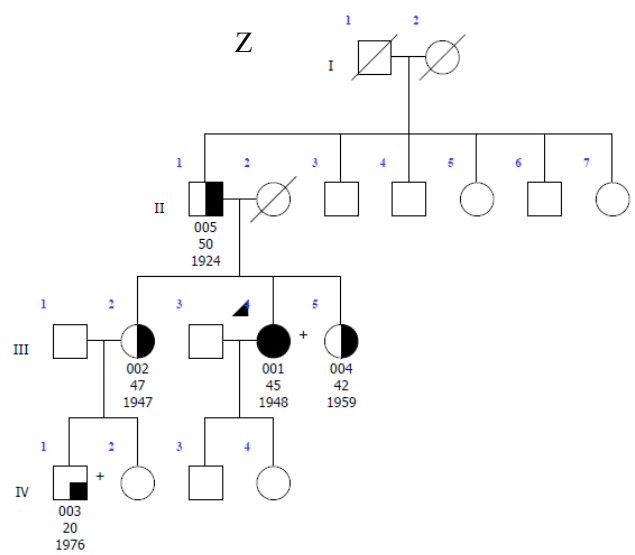

**Table S1 List of candidate variants and oligo primers included in the Sequenom genotyping assay for co-segregation analysis**

| CHR | POSITION  | 1st-PCR                          | 2nd-PCR                         | LENGTH (BP) | T <sub>m</sub> (°C) | DIRECTION |
|-----|-----------|----------------------------------|---------------------------------|-------------|---------------------|-----------|
| 1   | 3692043   | ACGTTGGATGTGTGTCCAGCACAGAAGAGG   | ACGTTGGATGGAGACACCAGCCTGCTATG   | 103         | 57.4                | R         |
| 1   | 12023663  | ACGTTGGATGCTACTACTTCAGCGTGGATG   | ACGTTGGATGAGCCTCACTTGTTCTGTTGG  | 103         | 53.9                | F         |
| 1   | 25893419  | ACGTTGGATGAAGCTGAAGAGGTCATCCTG   | ACGTTGGATGAGGACATGCATTACGCCAG   | 108         | 55.5                | R         |
| 1   | 31425169  | ACGTTGGATGCAGCCTGGAGGATTTTCATTG  | ACGTTGGATGATTCAGCTGAAACTGGAGCG  | 90          | 49.8                | R         |
| 1   | 31465406  | ACGTTGGATGGTTGGAGAAATCCTCCACAG   | ACGTTGGATGAACCAGAAATGGTTCTGAGGG | 95          | 61.8                | R         |
| 1   | 98205947  | ACGTTGGATGTGTGAGAAAGCTGTCCAAC    | ACGTTGGATGCTGTTATTTTCATTTGCAGAG | 120         | 46.8                | F         |
| 1   | 155224465 | ACGTTGGATGAACAACCTGTGCACCCAACCTC | ACGTTGGATGACCACCGAGAGCATCAAGAG  | 90          | 55.3                | F         |
| 1   | 156876581 | ACGTTGGATGATGTTCTTGCCTTCTGGTC    | ACGTTGGATGATGGCACTGGCAGCGGAACT  | 117         | 48.7                | F         |
| 1   | 158585056 | ACGTTGGATGTACAGCACCATGGATTGGC    | ACGTTGGATGTTGCTCCAGGTTGTGTTG    | 100         | 49                  | R         |
| 1   | 161495025 | ACGTTGGATGGTTGCGGATCATCAATGAGC   | ACGTTGGATGCCAGGTCAAAAATGAGCACG  | 115         | 53.1                | R         |
| 1   | 161495098 | ACGTTGGATGCATTTTTGACCTGGGTGGG    | ACGTTGGATGATCTCCAGCAGTGGCTTTC   | 110         | 52.6                | R         |
| 1   | 206239580 | ACGTTGGATGGTTCTCCAGGGTCAGAAAAG   | ACGTTGGATGCCACATGTCTCTGCTTTTC   | 99          | 49.3                | R         |
| 1   | 207013255 | ACGTTGGATGAAGAGTTGGCAATGTGCTG    | ACGTTGGATGAGAACCTCCTGGCGTTCTAC  | 116         | 51.7                | F         |
| 2   | 110332225 | ACGTTGGATGGCTGTCAAGGTTCTTCATGG   | ACGTTGGATGTTCTCGCATCCATGTGTGTC  | 111         | 47.9                | F         |
| 2   | 179401890 | ACGTTGGATGGCTCTATTGAAGAACTCCGC   | ACGTTGGATGCCACATAGTTGGTGATCCAG  | 99          | 48.7                | R         |
| 2   | 179482562 | ACGTTGGATGTGTGGCTGCACCTGGTTTTTC  | ACGTTGGATGATGTGGTGAAGGACAGGAG   | 100         | 47.7                | F         |
| 2   | 203500098 | ACGTTGGATGGTTCCGTTCCAGCTGAAGCA   | ACGTTGGATGACCACAGCAGCCACCGTTG   | 119         | 49.1                | R         |
| 2   | 203560633 | ACGTTGGATGTACGGTGCAGCAAGAGTATC   | ACGTTGGATGGACAAAACACGACAGCCTTC  | 100         | 51.2                | F         |
| 2   | 231865095 | ACGTTGGATGCTCACCTCTCTCTCTGTC     | ACGTTGGATGAAGTGGCACAGGAGCAGGAA  | 92          | 53                  | F         |
| 3   | 57557991  | ACGTTGGATGGCCAGTCAAGTCCTTCATAC   | ACGTTGGATGTACAGTGGTATGTTCAAGCC  | 86          | 59                  | R         |
| 3   | 78667061  | ACGTTGGATGCCACGTAACAAAAGCCTTC    | ACGTTGGATGGGTCTCAGATATGGATACGG  | 117         | 46.6                | F         |
| 4   | 15627106  | ACGTTGGATGTGTCTGTTGGCAGCAGCATT   | ACGTTGGATGTGGGAGTGATGACATAGTTC  | 120         | 49.3                | F         |
| 4   | 15638171  | ACGTTGGATGGCCAATGAACAGGGTAAAG    | ACGTTGGATGGTCGATGCAGTCAAGTAAGC  | 105         | 45.2                | R         |
| 4   | 24801667  | ACGTTGGATGTCTCGCCAGCGTGGACGAC    | ACGTTGGATGACGGCAGCCTCTGGAGGTA   | 117         | 49.8                | F         |
| 4   | 37962105  | ACGTTGGATGAGCTTCAGCACATCCTTGGC   | ACGTTGGATGGGCTACTCTGATCTACGTTG  | 95          | 51.3                | R         |
| 4   | 53492348  | ACGTTGGATGTCTGTTCTTCTCTCTCTG     | ACGTTGGATGCTTTGATAACTACATGCAGC  | 113         | 46.1                | R         |
| 4   | 138450988 | ACGTTGGATGGTAGGCACCAATGTGATGTC   | ACGTTGGATGTGGCCGAATCAACTTACCAG  | 99          | 50.1                | F         |
| 5   | 60834687  | ACGTTGGATGTGTGGCTTAGAGTGAACCAG   | ACGTTGGATGGAATCTACTGCTCCATCAGG  | 114         | 48                  | R         |
| 5   | 70308515  | ACGTTGGATGACAGCAGAAGCACTGAATCC   | ACGTTGGATGGTGACTTATGAGCCGTACAG  | 119         | 54.4                | F         |
| 5   | 89949082  | ACGTTGGATGTAGCAGAAACCACTCCAG     | ACGTTGGATGCTAAACTCTGGATCCAAG    | 107         | 50.1                | F         |
| 5   | 114598521 | ACGTTGGATGATGGCGCCACTGAGGATGA    | ACGTTGGATGAAAATCGCACGTCCGATCC   | 105         | 51.6                | F         |
| 5   | 122425849 | ACGTTGGATGGCGCCGCGGTTCTCTCTGA    | ACGTTGGATGGCTGTCCGGCGGAGGCTCA   | 109         | 53.3                | R         |
| 5   | 170863253 | ACGTTGGATGGGACCAGTGGGAAACACATC   | ACGTTGGATGGCACAACCATACTTGTTCC   | 100         | 55.8                | R         |
| 5   | 175923567 | ACGTTGGATGGGTATCAGGTTGAATGAGG    | ACGTTGGATGTCTGGCCATGATTATGCTG   | 98          | 46.6                | F         |
| 6   | 10903147  | ACGTTGGATGTCCAAAAGGGCTTGAAGAC    | ACGTTGGATGACATGCCTTCTGACAAAAGGG | 108         | 51.5                | F         |
| 6   | 70410688  | ACGTTGGATGGGTTTTCCCTCTTGATTATA   | ACGTTGGATGCCAAAAGAACCATATGCCA   | 120         | 46.1                | F         |

|    |           |                                |                                |     |      |   |
|----|-----------|--------------------------------|--------------------------------|-----|------|---|
| 6  | 70451681  | ACGTTGGATGGTCCCTATTGAAGAACTTGG | ACGTTGGATGCAAAAGTCCAAAGTATCAGG | 110 | 45.2 | F |
| 6  | 71571555  | ACGTTGGATGACTCTTCATGGTGACACTCG | ACGTTGGATGGATAACAACAGTGAAGAAC  | 118 | 50.5 | R |
| 6  | 71665630  | ACGTTGGATGACTGAGCAGCGCAACGCGG  | ACGTTGGATGTCGTCAGCGAAGAAGAGCAC | 109 | 51.7 | F |
| 6  | 71665759  | ACGTTGGATGACTGGATCCTGGTGGAGGAC | ACGTTGGATGACGTGCAGGTGAGTGCTGG  | 111 | 59   | F |
| 6  | 90482411  | ACGTTGGATGTTGCTGACACACTGCAAG   | ACGTTGGATGACAGGAGAAGTTCACCTTCG | 95  | 46.3 | F |
| 7  | 23871820  | ACGTTGGATGCTGATTGCTCCTTGGCATC  | ACGTTGGATGAATCCCTCCTGTAGCTTG   | 116 | 48.1 | R |
| 7  | 73083825  | ACGTTGGATGCACGAAGCTCCTGGTATTTG | ACGTTGGATGTACGCGCTGGCCAAGGAGAA | 108 | 52.8 | F |
| 7  | 106851022 | ACGTTGGATGAGGAGGAGCCTGTCTTTTC  | ACGTTGGATGTGTGTTCAACCCTGCAGAG  | 112 | 55.2 | R |
| 7  | 106871106 | ACGTTGGATGCTTACCTGAATGATCTCAGC | ACGTTGGATGTTGAGTGGAGTTGGCTGTG  | 107 | 48.4 | R |
| 7  | 107204365 | ACGTTGGATGGATTCTGCGTCACCACCTG  | ACGTTGGATGACCTTCCATGTTGGCAGGTG | 95  | 49.4 | F |
| 7  | 150690937 | ACGTTGGATGTGCTTGCCGCACAGCCCAA  | ACGTTGGATGACATGGGCAACTGAAGAGC  | 108 | 56   | F |
| 7  | 150692296 | ACGTTGGATGTCTTACACGAGGGAACTTG  | ACGTTGGATGACAAACCTTCTGATGACC   | 119 | 58.9 | F |
| 7  | 150695652 | ACGTTGGATGGTCCAGATTCGGAAGTCTC  | ACGTTGGATGACCAGCTTTCCCATGC     | 107 | 52.8 | F |
| 8  | 23177415  | ACGTTGGATGATGGTGTGTGCCAAAACCTG | ACGTTGGATGCTTCTCACCTGGAAGGCGT  | 115 | 55.9 | R |
| 8  | 86127236  | ACGTTGGATGGATAAACATTATGAATGAGG | ACGTTGGATGTTGCGAAATGTGAAGTTCC  | 103 | 47.8 | F |
| 8  | 99441344  | ACGTTGGATGAGGCAGAGGCAGTCAGCTTT | ACGTTGGATGTACCGTCAGTATGACCACAG | 97  | 52   | F |
| 8  | 99441520  | ACGTTGGATGAGCTGTGACTTTGGAGATGG | ACGTTGGATGTCGTCAGGCTTGCATAAG   | 118 | 49.8 | R |
| 9  | 90535706  | ACGTTGGATGATGATCTTGCTGGACTGACG | ACGTTGGATGACAGTCAAGTTTCTGCCCTC | 103 | 45.2 | R |
| 9  | 91090065  | ACGTTGGATGAACCAGGAGAAGTTGTGGAC | ACGTTGGATGTACCATGCCAGTCTTTTC   | 104 | 47.5 | R |
| 9  | 114337013 | ACGTTGGATGATATAACAGAACCGCCAC   | ACGTTGGATGTTTCTCCTTGCCAGCCTTG  | 102 | 51.2 | F |
| 9  | 114345767 | ACGTTGGATGATGGTTAATGCAGCAGCTGG | ACGTTGGATGACTGGAGAAAGGCACTTACC | 99  | 47.2 | F |
| 9  | 127618232 | ACGTTGGATGTGGAAGTGGTCTTGAATCC  | ACGTTGGATGATCAGGTGGTGGGACAAG   | 113 | 48.3 | F |
| 9  | 127619818 | ACGTTGGATGTCTAGTCTGATCGCAGCTC  | ACGTTGGATGTCTACTTTCAGCAGGAGTC  | 115 | 64.9 | F |
| 9  | 130941045 | ACGTTGGATGATGAGCAGCCTCACCCAG   | ACGTTGGATGACTGCATCAGGTGGCATCTC | 120 | 53.1 | R |
| 10 | 49667877  | ACGTTGGATGCCTAGAGGAAACAGTCCACC | ACGTTGGATGATGAAGTCCACACTGCTC   | 101 | 55.8 | R |
| 10 | 82298130  | ACGTTGGATGTGCACGACATGTACATCGAC | ACGTTGGATGCCCGATTTGTAGAAGAGG   | 101 | 52.4 | F |
| 11 | 556092    | ACGTTGGATGTCCAGTCTGGGGCGAGG    | ACGTTGGATGAGCCGCGATGGAGAGGAG   | 113 | 67.3 | R |
| 11 | 10014554  | ACGTTGGATGGTACTCTATCTTACTTGTGG | ACGTTGGATGCCAAGGATATAGATCTGCC  | 101 | 46.1 | F |
| 11 | 18723197  | ACGTTGGATGATGGGTAGAGGAGGGCATAG | ACGTTGGATGATGCAGCCACTGGCTCTTC  | 96  | 54.3 | F |
| 11 | 64374967  | ACGTTGGATGACTCCCGGATCACCTCCACT | ACGTTGGATGCTTCCCCATCTGCCACA    | 100 | 52.7 | R |
| 11 | 85436267  | ACGTTGGATGTTCCCTTCCAGCTGGATAAC | ACGTTGGATGAGTCATTCTCCACCCAGAC  | 117 | 48.4 | F |
| 11 | 126143283 | ACGTTGGATGTGTCTGCACAGGAGTACC   | ACGTTGGATGTTTCTGAAGCCAGCAAGAGG | 112 | 50.1 | F |
| 12 | 56079002  | ACGTTGGATGTTCTCCTCTTGAAGTCTG   | ACGTTGGATGTCTCAAACGGGCGAAGCAC  | 114 | 51.8 | F |
| 12 | 57442091  | ACGTTGGATGAGGAGGACAAGATCCTCCAC | ACGTTGGATGGGACATCAGCAAAGTGTGCC | 119 | 49.7 | F |
| 12 | 58111943  | ACGTTGGATGAACTGTCTTCTCCCACTC   | ACGTTGGATGTTCTGCAGCATCATCCACAG | 101 | 52.6 | F |
| 12 | 58131363  | ACGTTGGATGAGAGACCGAAGCTCCAGTCC | ACGTTGGATGTGCATGGCCGAAAGCGAG   | 97  | 48.3 | R |
| 12 | 58131868  | ACGTTGGATGAAGAGACGTTCTGCGCGCTT | ACGTTGGATGTGCCAGAGGCTCCGAGACTG | 101 | 51.9 | R |
| 12 | 62997109  | ACGTTGGATGCCGCTCGAAAGCAGGAAATG | ACGTTGGATGCAGTCCAGAACCAGTTGGTG | 81  | 55.6 | F |
| 12 | 77424029  | ACGTTGGATGACAGAAAATACTGGTGGGC  | ACGTTGGATGCTGTTGCTCCTTCCCTGTC  | 96  | 46.6 | F |
| 12 | 78388607  | ACGTTGGATGTTCTCCTCATACAGTCTGGC | ACGTTGGATGGACTGGTTGCAATCCACTG  | 87  | 57.3 | F |
| 12 | 112037104 | ACGTTGGATGTCCCTCCCGCAGAGCTCG   | ACGTTGGATGCCGTTGCCGTTGCTACCAA  | 80  | 67.1 | R |
| 12 | 133297389 | ACGTTGGATGATCACCCACCTGGTGATCC  | ACGTTGGATGCCTCAGGATCGAGTGATCTT | 118 | 56.3 | F |
| 13 | 28155579  | ACGTTGGATGGCTACAAGTGCCTCAGAAAC | ACGTTGGATGACTAGACTTCTTGCAAC    | 113 | 49.5 | F |

|    |           |                                 |                                |     |      |   |
|----|-----------|---------------------------------|--------------------------------|-----|------|---|
| 13 | 28155645  | ACGTTGGATGGAGGCACTGTAGCAGAATG   | ACGTTGGATGCCTAGTCTGCCATATTTGCC | 102 | 54.5 | R |
| 13 | 43935483  | ACGTTGGATGGAGTACAGCTTTTGCAGTGG  | ACGTTGGATGCCCATTAACCCAATGATACC | 120 | 54.4 | R |
| 13 | 115047277 | ACGTTGGATGAGCAGCAGGAGGCTGAGAC   | ACGTTGGATGTCTTCTCCTCGCGAGGTTTG | 98  | 61.6 | R |
| 13 | 115047281 | ACGTTGGATGAGGCTGAGACGCCGCCAAC   | ACGTTGGATGCCGTCCCCACCTTGCTCAG  | 116 | 52.7 | R |
| 14 | 21876549  | ACGTTGGATGAATTACTAACTGGGAGCGAG  | ACGTTGGATGGTTGAATCATCTGCCTGCTG | 112 | 50.1 | R |
| 14 | 77580363  | ACGTTGGATGAAGCGCCTATGTTTGCTCTG  | ACGTTGGATGTAGCTCACCTTTATGGGCTG | 104 | 49.1 | F |
| 15 | 40627799  | ACGTTGGATGCTGTGGAAGCCACTGACTC   | ACGTTGGATGATGGAGCAGGGCCGACTGG  | 111 | 69.3 | R |
| 15 | 40629956  | ACGTTGGATGAGCGGGAGCAGATCGACCTA  | ACGTTGGATGTGGACTTGGCCTTGTCAG   | 113 | 55.5 | F |
| 15 | 65621867  | ACGTTGGATGGATGTGAAAACAGCTGTC    | ACGTTGGATGTCCCCGTCTCGCCCCATTA  | 107 | 57.3 | R |
| 15 | 71197007  | ACGTTGGATGCTCGGATACAAAATATTTTC  | ACGTTGGATGACATCTCAGAGTCGAAAGCC | 118 | 48.5 | R |
| 15 | 71203904  | ACGTTGGATGCCTGATTTCCATGAAGATCC  | ACGTTGGATGTCTGGTTTTCAGAATCAAG  | 100 | 45.3 | F |
| 15 | 71300911  | ACGTTGGATGAATCTTCAGTTTAGGAAGC   | ACGTTGGATGTGGAGTGTCAAACAGCAGG  | 113 | 48.5 | F |
| 16 | 824264    | ACGTTGGATGACTGGTTTGGTCTTGACTC   | ACGTTGGATGTTCCCGCAGCGTGGTGGCTT | 118 | 52   | F |
| 16 | 11370067  | ACGTTGGATGAGCCTCCTTCGAGAGCAGT   | ACGTTGGATGACGTGCGAGGTCTACGAGAG | 90  | 51.4 | R |
| 16 | 11370190  | ACGTTGGATGAACACCATGGTCCGATACCG  | ACGTTGGATGTCTTGCCCATGCAACTGCTG | 100 | 58.5 | F |
| 16 | 23569478  | ACGTTGGATGACTTCACGTCATGCTTGGTC  | ACGTTGGATGTGCGTCAGCAACGGCGAAG  | 114 | 55.6 | F |
| 16 | 30762527  | ACGTTGGATGAAGGATGTGTGTCTCTCGCC  | ACGTTGGATGCGGTGAAGATTATGGAAGTG | 112 | 54.1 | F |
| 16 | 30764591  | ACGTTGGATGGGGAGAGCTGTTTGACTATC  | ACGTTGGATGCTCAACCTTACCTGGTTTC  | 89  | 50.1 | R |
| 16 | 88495665  | ACGTTGGATGACATCGCGACAGGGAAGAG   | ACGTTGGATGTAGTGGGAGCCTCCCCAG   | 107 | 55.7 | F |
| 16 | 88497041  | ACGTTGGATGAAGAGGAAGGCTCGGGGCGG  | ACGTTGGATGCGGTGGCGCCTGTTCTTCT  | 97  | 53.4 | R |
| 16 | 88497170  | ACGTTGGATGTCCGCGAGTACGACTTCGCC  | ACGTTGGATGTTCTCTTCTCGCCTCGGC   | 120 | 57.5 | R |
| 16 | 88497219  | ACGTTGGATGTTCTTCTCTTCTCGCCTC    | ACGTTGGATGAGTACGACTTCGCCTCGGA  | 118 | 52.5 | F |
| 16 | 88497245  | ACGTTGGATGTCTCTGGGACCCTGGGTCA   | ACGTTGGATGAGGAGGACGAGCAGCCTCCG | 120 | 48.9 | F |
| 16 | 88497318  | ACGTTGGATGAGACCCGCCGGCTCCTCG    | ACGTTGGATGAGAGGATGAGCCACAGAAAC | 111 | 59   | F |
| 16 | 88497828  | ACGTTGGATGCACGGGTGCCAGAAATTCTC  | ACGTTGGATGACACAGGCCCCAGTCTCCA  | 92  | 49   | F |
| 16 | 88498257  | ACGTTGGATGAGAGGGGTGGTCAATCTG    | ACGTTGGATGGACCTTGGAGTCTCATC    | 82  | 47.4 | F |
| 16 | 88502673  | ACGTTGGATGTCTGCCTCTGCCATGAGGAC  | ACGTTGGATGCTATTGAGGAACCCATCCAG | 105 | 50.4 | R |
| 17 | 3118915   | ACGTTGGATGCCAGGAGGATGAATCCAG    | ACGTTGGATGTGATATTCCTCTCCCCTTC  | 101 | 52.4 | R |
| 17 | 4836266   | ACGTTGGATGAATCAGCTGCAAAGCCTGCC  | ACGTTGGATGACCAAGAGGCAGCGAGGTCA | 116 | 48.2 | R |
| 17 | 4837740   | ACGTTGGATGCTCCTTCTGCCACTAGAG    | ACGTTGGATGGAGGTTGCTTCCCCTTTC   | 105 | 48.6 | F |
| 17 | 8025206   | ACGTTGGATGTTGGGGCGAGATAGCCGT    | ACGTTGGATGGAGTGCCTGCTTCGCTTGG  | 115 | 48.8 | R |
| 17 | 27041879  | ACGTTGGATGGATTTCTCCAGCTCAGCCAG  | ACGTTGGATGTGTGCAGGTGAGAATGTCC  | 107 | 53.2 | R |
| 17 | 40950556  | ACGTTGGATGGTCACGATGTTCCGGGTTTC  | ACGTTGGATGGAGCAACTGCATTCCATGCG | 103 | 53   | R |
| 17 | 59949696  | ACGTTGGATGACAGAGCAAGATAGGCCTTC  | ACGTTGGATGTTCTTCCCTGGTAACTCCG  | 101 | 46.1 | F |
| 17 | 60002456  | ACGTTGGATGGCAATTATTTCCATATCAGTG | ACGTTGGATGTGATACCAGGATGCTCTCTC | 119 | 48.4 | F |
| 17 | 60003873  | ACGTTGGATGTTTCTTATCCTGAGCCGAGC  | ACGTTGGATGGACTTCTTCTGCCCTGTTTG | 100 | 56.1 | R |
| 17 | 65344710  | ACGTTGGATGAAATGGAGGCTGCCTCTTTC  | ACGTTGGATGAAATTGAGCGTGCAGGACTG | 101 | 45.4 | R |
| 17 | 80397532  | ACGTTGGATGAGGTACGACCACTACTCTG   | ACGTTGGATGATACCGCGTAGAAGCAACTG | 109 | 45.2 | F |
| 19 | 7974729   | ACGTTGGATGCTCGCCATCCTCAGAGAGC   | ACGTTGGATGTGAACAGGGTTGACGGGAG  | 106 | 54.1 | R |
| 19 | 9801082   | ACGTTGGATGGGAGAGAAGCCTTATGGATG  | ACGTTGGATGAAGGGCCTTCTTTCATGGTG | 118 | 50.9 | R |
| 19 | 10073550  | ACGTTGGATGAGCCTCCAGGCTTTTCTTCTG | ACGTTGGATGAGATCTAGATGGACCAAGG  | 116 | 52.8 | F |
| 19 | 12911622  | ACGTTGGATGCATTGCTCAACCTCTGGAAC  | ACGTTGGATGCATCCTTAAAGACTTGGGCG | 97  | 45.5 | F |
| 19 | 19368787  | ACGTTGGATGGGTAGCAGTAGACGCCGAA   | ACGTTGGATGTGAACCCGCGAGCGCGCTG  | 116 | 61.9 | R |



|    |           |                                 |                                |     |      |   |
|----|-----------|---------------------------------|--------------------------------|-----|------|---|
| 19 | 39294173  | ACGTTGGATGTGTTTCCCAAGCCATACCG   | ACGTTGGATGAGATATCTGTCGACTCTTGG | 119 | 46.5 | F |
| 20 | 1433202   | ACGTTGGATGAGTGAAGGCTTTGAAGGCTC  | ACGTTGGATGGGTGAACTTGGATATGGAGG | 93  | 48   | R |
| 20 | 62319887  | ACGTTGGATGAGAAGCTGCCTTTGCTCCTG  | ACGTTGGATGCTGCCTCTTCTCCACAG    | 112 | 47   | R |
| 22 | 28501710  | ACGTTGGATGAATTGGCTGTGCAGACTTCC  | ACGTTGGATGCGTGGTTGCTCATGAACTTG | 98  | 47.1 | F |
| X  | 1475174   | ACGTTGGATGCCCAACATGACTGCAAAGTG  | ACGTTGGATGTGTATCTGAAGCTCATAGCG | 118 | 47.4 | F |
| X  | 1508583   | ACGTTGGATGACAATGCAGTCCACGATGCC  | ACGTTGGATGTCTGGTCTGAACACCCTCTG | 115 | 52.2 | F |
| X  | 1537953   | ACGTTGGATGAGACGCGGCTGAGGTTTTCAT | ACGTTGGATGAGAAGCGGGACAGATTGAAG | 110 | 60   | R |
| X  | 1540706   | ACGTTGGATGCCATTTCTCCAGGTTACAG   | ACGTTGGATGAAGCCGTGCAGAGAGTATTC | 100 | 46.4 | R |
| X  | 1719897   | ACGTTGGATGACCACGCTGCACCCCTCG    | ACGTTGGATGCCGTTACGCTTTTGGGAG   | 118 | 54.6 | F |
| X  | 2139200   | ACGTTGGATGAGGGACTTGGTCTTTTCTC   | ACGTTGGATGTCCATCTACGCAGCAGTAC  | 100 | 47.3 | F |
| X  | 12937720  | ACGTTGGATGCTCTATTTGGCCTGGAAGT   | ACGTTGGATGGTCAGCGTTTCAAATACTCC | 100 | 46.9 | R |
| X  | 100177974 | ACGTTGGATGCCTCACACTGTGGAAGAAAG  | ACGTTGGATGCCTCGCCATCTATTAGCATC | 100 | 46.6 | F |
| X  | 140984599 | ACGTTGGATGGAGGATGCCTCCTCCACTT   | ACGTTGGATGAGGGTGAGGATGAGGACAAG | 99  | 50   | F |
| X  | 152990762 | ACGTTGGATGGACTTTGTGGGCTCCATAGG  | ACGTTGGATGTGACATGCCGGTGCTCTCCA | 120 | 57.8 | F |

**Table S2 Genomic regions providing evidence of linkage in ET families**

| Phenotype<br>P1 or P2* | LOD score      | P Value              | Chr | 1 LOD unit support<br>interval (bp) | No. of Genes | Candidate<br>Genes                                              |
|------------------------|----------------|----------------------|-----|-------------------------------------|--------------|-----------------------------------------------------------------|
| P1<br>P2               | 2.288<br>3.707 | $1.8 \times 10^{-5}$ | 5   | 1166067-91384315                    | 426          | <i>SEMA5A</i><br><i>NDUFS4</i>                                  |
| P1                     | 3.013          | $1.1 \times 10^{-3}$ | 6   | 7613899-8992572                     | 11           | <i>BLOC1S5</i><br><i>TXNDC5</i>                                 |
| P1<br>P2               | 3.114<br>3.774 | $7.6 \times 10^{-5}$ | 7   | 8939150-16780405                    | 18           | <i>NDUFA4</i><br><i>PHF14</i><br><i>TMEM106B</i><br><i>ETV1</i> |
| P1<br>P2               | 2.729<br>3.312 | $4.7 \times 10^{-5}$ | 8   | 94960934-101969832                  | 27           | <i>NDUFAF6</i><br><i>TP53INP1</i><br><b><i>KCNS2</i></b>        |
| P1<br>P2               | 2.483<br>3.071 | $8.4 \times 10^{-5}$ | 11  | 99051583-105083703                  | 45           | <i>CNTN5</i>                                                    |
| P1<br>P2               | 2.698<br>3.568 | $2.5 \times 10^{-5}$ | 16  | 51954866-53935253                   | 3            | <i>IRX3</i>                                                     |

\*A stringent analysis (phenotype 1, P1) in which only individuals with a diagnosis of definite or probable ET were classified as affected, and individuals with a diagnosis of possible ET were classified as unknown, and a secondary analysis with a broader phenotype (phenotype 2, P2) in which individuals with a diagnosis of definite, probable or possible ET were classified as affected.

Abbreviations/definitions: Chr, Chromosome; LOD, The 'LOD' (logarithm (base 10) of odds) score corresponds to the LOD score of the gene; p-value, significance level for LOD score; 1 LOD unit support interval was determined by finding the maximum lod score, Z<sub>max</sub> and determining those points for theta for which the LOD score is at least Z<sub>max</sub>-1. Candidate genes are positional candidates of interest based on ET phenotype.
